# Supplementary material for: TRIM27 promotes the development of esophagus cancer via regulating PTEN/AKT signaling pathway
Source: Springer Nature journal article supplement (doi:10.1186/s12935-019-0998-4), 2019-11-08
Supplement: MOESM1 [file 17367324]

## Supplementary File1: Primer sequence information

### 1.1 Homo sapiens tripartite motif containing 27 (TRIM27), mRNA

NM\_006510.4

Primer F 5' AGGACCTGCCTGACAACC 3'

Primer R 5' CTTTCCCATACCACAAAGAC 3'

Pos: 1034-1246

Amplified product: Size: 213 bps

### 1.2 Homo sapiens glyceraldehyde-3-phosphate dehydrogenase (GAPDH), transcript variant 2, mRNA

NM\_001256799.2

Primer F 5' AATCCCATCACCATCTTC 3'

Primer R 5' AGGCTGTTGTCATACTTC 3'

Pos: 436-653

Amplified product: Size: 218 bps

## Supplementary Table1: Human gene TRIM27 (NM\_006510.4) RNAi targeting locus information

| RNAi Targeting Locus |                | Sequence            |
|----------------------|----------------|---------------------|
| Name                 | locus position |                     |
| siTRIM27-1           | 941-959        | CCCAGTTCTCTTGCAACAT |
| siTRIM27-2           | 1052-1070      | GGGCTGAAAGAATCAGGAT |
| siTRIM27-3           | 1495-1513      | GGATTCTGGGCAGTGTCTT |

## Supplementary Table 2: The primary antibodies information

| Antibody name    | Source    | Dilution factor |
|------------------|-----------|-----------------|
| TRIM27           | Abcam, UK | 1:1000          |
| GLUT1            | Abcam, UK | 1:100000        |
| HK II            | Abcam, UK | 1:500           |
| Cleaved Caspase3 | CST, USA  | 1:1000          |
| AKT              | CST, USA  | 1:1000          |
| P-AKT            | CST, USA  | 1:2000          |
| GAPDH            | CST, USA  | 1:2000          |
